1 **Fentanyl binds to the  $\mu$ -opioid receptor via the lipid membrane and transmembrane helices**

2 Katy J Sutcliffe<sup>1</sup>, Robin A Corey<sup>2</sup>, Steven J Charlton<sup>3</sup>, Richard B Sessions<sup>4</sup>, Graeme Henderson<sup>1\*</sup>

3 & Eamonn Kelly<sup>1\*</sup>

4 <sup>1</sup>School of Physiology, Pharmacology & Neuroscience, University of Bristol

5 <sup>2</sup>Department of Biochemistry, University of Oxford

6 <sup>3</sup>School of Life Sciences, University of Nottingham

7 <sup>4</sup>School of Biochemistry, University of Bristol

8 \*Correspondence to [graeme.henderson@bristol.ac.uk](mailto:graeme.henderson@bristol.ac.uk); [E.Kelly@bristol.ac.uk](mailto:E.Kelly@bristol.ac.uk)

9

10 **Abstract**

11 Overdose deaths from synthetic opioids, such as fentanyl, have reached epidemic proportions  
12 in the USA and are increasing worldwide. Fentanyl is a potent opioid agonist, that is less well  
13 reversed by naloxone than morphine. Due to fentanyl's high lipophilicity and elongated  
14 structure we hypothesised that its unusual pharmacology may be explained by a novel binding  
15 mode to the  $\mu$ -opioid receptor (MOPr).

16 By employing coarse-grained molecular dynamics simulations and free energy calculations,  
17 we determined the routes by which fentanyl and morphine access the orthosteric pocket of  
18 MOPr.

19 Morphine accesses MOPr via the aqueous pathway; first binding to an extracellular vestibule,  
20 then diffusing into the orthosteric pocket. In contrast, fentanyl takes a novel route; first  
21 partitioning into the membrane, before accessing the orthosteric site by diffusing through a  
22 ligand-induced gap between the transmembrane helices.

23 This novel lipophilic route may explain the high potency and lower susceptibility of fentanyl  
24 to reversal by naloxone.

25

## 26 **Introduction**

27 The synthetic opioid agonist, fentanyl, has been in medicinal use for over 50 years as a  
28 powerful, fast-acting analgesic and for induction of sedation and general anaesthesia.  
29 However, since 2014 fentanyl and fentanyl analogues (fentanyls) have increasingly appeared  
30 in the illicit drug market in North America (1, 2); this has been associated with a dramatic rise  
31 in the number of acute opioid overdose deaths involving fentanyls (3), with the ease of  
32 synthesis and transport making fentanyls attractive to suppliers of illicit opioids (4).  
33 Concerningly, there are increasing reports that fentanyl overdose requires higher doses of the  
34 antagonist naloxone to reverse, compared to heroin (4-10). Indeed, we have recently shown  
35 that naloxone reverses respiratory depression induced by fentanyl in mice less readily, than  
36 that induced by morphine (11). This finding is at odds with classical receptor theory, as under  
37 competitive conditions the degree of antagonism depends only on the affinity and  
38 concentration of the antagonist, not the potency of the agonist (12). Fentanyls, therefore, are  
39 an increasing public health concern, and exhibit a unique pharmacology which is yet to be  
40 fully understood.

41 In *in vitro* radioligand binding and signaling experiments there is a discrepancy between the  
42 relative potencies of fentanyl and morphine in experiments performed in membrane  
43 homogenate and intact cell systems. In membrane homogenate experiments fentanyl and  
44 morphine exhibit similar affinity of binding to the m opioid receptor (MOPr), both in the  
45 absence and presence of Na<sup>+</sup> ions (13-15), whilst in membrane homogenate studies of  
46 receptor activation using GTPγS binding the potency of fentanyl has been reported to be less  
47 than 2 fold greater than that of morphine with fentanyl having equal or only slightly greater  
48 agonist efficacy (14-16). In marked contrast, in intact cell studies of MOPr signaling (cyclic

49 AMP inhibition, G protein activation and arrestin translocation) fentanyl is some 5 to 50 fold  
50 more potent than morphine (16-20). We propose that this discrepancy may be explained by  
51 the unusual properties of fentanyl. Firstly, fentanyls are highly lipophilic compared to other  
52 opioid ligands (21, 22) and may therefore in intact cells interact with, or even partition into,  
53 the lipid bilayer thus increasing the concentration of drug in the vicinity of the receptor (23-  
54 25). Secondly, fentanyls have an elongated chemical structure with a central protonatable  
55 nitrogen and 6 rotatable bonds, compared to the rigid ring structure of morphine, naloxone  
56 and other morphinan compounds (Supplementary Fig 1A). This flexible structure may  
57 facilitate a novel binding process, distinct from that of morphinan opioid agonists and the  
58 antagonist naloxone.

59 MOPr, which mediates the pharmacological effects of fentanyl (11), is a G protein-coupled  
60 receptor (GPCR) found primarily at the plasma membrane. The MOPr structure follows the  
61 general architecture of a class A GPCR (26-28), with a deep aqueous binding pocket for  
62 orthosteric ligands which is shielded from the extracellular milieu by three extracellular loops  
63 (ECLs) and from the lipid bilayer by the seven transmembrane helices (TMDs). X-ray crystal  
64 structures and cryo-electron microscopy structures of the MOPr reveal small molecule  
65 morphinan ligands (26, 27) and the peptide DAMGO (28) bind within this orthosteric site via  
66 a key interaction between the protonated amine of the ligand and D147<sup>3.32</sup> (residues are  
67 labelled according to the Ballesteros-Weinstein system (29)) (Supplementary Fig 2).

68 It is generally assumed that GPCR ligands bind to the orthosteric site directly from the  
69 extracellular aqueous phase (30-33). However, studies of sphingosine-1-phosphate,  
70 cannabinoid (CB2), protease activated (PAR1), and purinergic (P2Y1) receptors have shown  
71 that some highly lipophilic ligands are able to access the orthosteric pocket by diffusing

72 through the lipid membrane and the receptor transmembrane helices (34-37). Therefore,  
73 based on fentanyl's high lipophilicity, elongated structure, and differing potencies dependent  
74 on the membrane environment, we hypothesised that fentanyl may bind to the MOPr in a  
75 non-canonical fashion via the lipid bilayer.

76 Long timescale all-atom molecular dynamics (MD) simulations have been used to capture  
77 small molecule ligands binding to GPCRs (30, 32, 33). However, capturing a rare event such as  
78 ligand binding usually requires millisecond timescale simulations using specially designed  
79 machines (38). In addition, fentanyl has many rotatable bonds and therefore many degrees  
80 of freedom which can pose sampling problems. Coarse-grain (CG) MD can be utilised to  
81 overcome these sampling issues (39-41). In CG MD, rather than representing each individual  
82 atom as a defined bead, groups of atoms are represented as a single bead which describes  
83 the overall properties of the chemical group. This lower resolution representation results in  
84 fewer beads and fewer degrees of freedom to describe a system, meaning the conformational  
85 landscape can be sampled more efficiently, and rare events such as ligand binding can be  
86 more readily captured (42, 43). To determine how fentanyls and morphinans access and bind  
87 within the orthosteric site, we employed unbiased CG MD simulations of membrane-  
88 embedded MOPr solvated in water, ions and opioid ligands.

## 89 **Results**

90 We built molecular systems of the MOPr (26, 44, 45) (PDB: 4DKL) in a solvated membrane  
91 using the coarse grained MARTINI 2.2 force field (see Methods for details) (Supplementary  
92 Fig 1B). We added 6 molecules of either protonated fentanyl, neutral fentanyl, protonated  
93 morphine or neutral morphine (Supplementary Fig 1C and D) to the solvent and ran 3 - 6

94 independent repeats of 1 - 5  $\mu$ s, unbiased CG MD simulations to allow the ligands to bind to  
95 the MOPr (Supplementary Table 1).

96 We first characterised how the protonated and neutral forms of fentanyl and morphine  
97 interacted with the phospholipid membrane. In all simulations, fentanyl and morphine rapidly  
98 diffused from the solvent to interact with the phospholipid bilayer. Both the protonated and  
99 neutral fentanyl molecules fully partitioned into the membrane (Fig 1A), with the neutral form  
100 of the ligand penetrating deeper into the bilayer centre (Fig 1C and Supplementary Fig 3A). In  
101 contrast morphine interacted only with the phosphate head groups at the lipid-solvent  
102 interface (Fig 1B), and neither the protonated nor neutral form of the ligand partitioned into  
103 the bilayer (Fig 1C).

104 To further quantify the propensity for fentanyl and morphine to partition between the  
105 aqueous and lipid phase, we performed steered MD and umbrella sampling to calculate the  
106 free energy change ( $\Delta G$ ) of membrane partitioning. Steered MD uses an external force to  
107 “pull” the ligand away from the center of the membrane (46), creating a trajectory of the  
108 ligand moving between the lipid and aqueous solvent from which umbrella sampling can be  
109 performed to extract potential of mean force (PMF) profiles. Using these PMFs,  $\Delta G$  can be  
110 calculated as the free energy difference between the ligand residing in the bilayer center  
111 versus the aqueous solvent. The resulting  $\Delta G$  values are shown in Fig 1D, and the PMF profiles  
112 in Supplementary Fig 3B-E.

113 The calculated  $\Delta G$  for membrane partitioning for the protonated and neutral forms of  
114 fentanyl were  $-50.3 \pm 6.0$  kJmol<sup>-1</sup> and  $-66.1 \pm 4.1$  kJmol<sup>-1</sup>, respectively. Whereas, the values  
115 for morphine showed a much smaller free energy difference (protonated;  $-20.6 \pm 0.3$  kJmol<sup>-1</sup>,  
116 neutral;  $-27.3 \pm 0.3$  kJmol<sup>-1</sup>). The spontaneous membrane partitioning exhibited by fentanyl

117 in the unbiased CG simulations, along with this greater free energy change in partitioning  
118 between the lipid and the aqueous solvent, suggests that fentanyl has a greater propensity  
119 to concentrate in the cell membrane, compared to morphine.

## 120 **Fentanyl binds to MOPr via the lipid phase and the transmembrane helices**

121 For the remaining analyses, we focus on the simulations of the protonated ligands, as the  
122 charged species is required to form the canonical amine – D147<sup>3.32</sup> salt bridge essential for  
123 opioid ligand binding within the orthosteric pocket.

124 In the CG MD simulations fentanyl molecules in the lipid bilayer appeared to congregate  
125 around MOPr (Fig 1A). We therefore constructed ligand density maps across all the fentanyl  
126 simulations (Fig 2A), using the VMD VolMap tool (47). Fentanyl molecules cluster around the  
127 receptor helices in the upper leaflet of the membrane, with densities determined on the lipid-  
128 facing sides of the TM1/2, TM6/7 and TM7/1 interfaces.

129 Most notably, we also observed fentanyl diffusing through MOPr to the orthosteric binding  
130 pocket via a novel lipophilic pathway (see Supplementary Movie 1). Snapshots from the MD  
131 simulation (Fig 2C and Supplementary Fig 4A) show fentanyl first partitioning into the lipid  
132 bilayer, then interacting with a ligand-induced gap (Supplementary Fig 4C and D) at the TM6/7  
133 interface, and finally accessing the orthosteric site by diffusing through this gap in the MOPr  
134 helices. The fentanyl molecule took 3  $\mu$ s to diffuse across the receptor TM domains to the  
135 orthosteric site (Fig 2B).

136 The TM6/7 interface and the gap induced by the fentanyl molecule is shown in Fig 2D. This  
137 interface comprises hydrophobic and polar residues from TM6 and 7, as well as ECL3.  
138 Specifically, the relatively small side chains of L305<sup>6.60</sup>, T307<sup>ECL3</sup>, I308<sup>ECL3</sup> and P309<sup>ECL3</sup> allow

139 formation of a pore through which the phenethyl group of fentanyl (represented by the F1,  
140 F2 and F3 beads, see Supplementary Fig 1D) can access the receptor orthosteric pocket.  
141 Meanwhile, the aromatic side chain of W318<sup>7,35</sup> stabilises the position of fentanyl's N-phenyl-  
142 propanamide (represented by the F7, F8 and F9 beads, see Supplementary Fig 1D).

### 143 **Morphine binds to MOPr via the aqueous phase and an extracellular vestibule site**

144 During the unbiased CG simulations, we observed morphine spontaneously binding to the  
145 MOPr via the canonical aqueous pathway (see Supplementary Movie 2). Ligand density maps  
146 show a density for a morphine molecule in the extracellular portion of the MOPr; above and  
147 within the orthosteric binding site (Fig 3A). Plotting the distance between the charged Qd  
148 bead of morphine and the side chain bead of D147<sup>3,32</sup> shows that the ligand rapidly diffuses  
149 from the aqueous solvent to interact with the extracellular surface of MOPr within the first  
150 50 ns of the CG simulation (Fig 3B). Morphine maintains stable interactions with this  
151 extracellular site for 4.2  $\mu$ s, before finally moving deeper into the orthosteric binding pocket.  
152 Figure 3C and Supplementary Fig 4B show snapshots of morphine travelling along this  
153 canonical aqueous binding pathway, with it initially binding to the extracellular vestibule site  
154 and then finally binding within the orthosteric pocket.

155 The extracellular vestibule site is shown in Fig 3D, comprising primarily polar or charged  
156 residue side chains in ECL2 and the extracellular ends of TMs 5, 6 and 7. This extracellular  
157 vestibule site (48) appears to be a conserved feature of small molecule binding to Class A  
158 GPCRs, having previously been highlighted in MD simulations of the  $\beta$ 1 and  $\beta$ 2 adrenergic  
159 receptors (32), M3 muscarinic receptor (33), adenosine A<sub>2A</sub> receptor (42) and oliceridine  
160 binding to the MOPr (30).

### 161 **Calculation of the relative binding energies in the aqueous and lipophilic access routes**



162 Next, we sought to further characterize the aqueous and lipid binding pathways by calculation  
163 of the free energy of binding ( $\Delta G_{\text{binding}}$ ) for each ligand in each pathway.

164 Starting from the final frames of the simulations where fentanyl (Fig 2C) or morphine (Fig 3C)  
165 bound in the orthosteric site, steered MD simulations were performed to recreate the  
166 aqueous and lipid binding routes for each ligand. Ligands were “pulled” from the orthosteric  
167 site along either the aqueous or lipid access route, generating a trajectory from which starting  
168 conformations for umbrella sampling could be generated. The resulting PMF profiles are  
169 presented in Fig 4, along with the calculated  $\Delta G_{\text{binding}}$  values for each ligand in each binding  
170 pathway. Here,  $\Delta G_{\text{binding}}$  represents the free energy difference between the ligand-bound  
171 MOPr and the unbound ligand residing in either the aqueous solvent (Fig 4A and B) or the  
172 lipid membrane (Fig 4C and D).

173 The PMF profiles for morphine and fentanyl binding via the aqueous pathway are shown in  
174 Fig 4A and B, respectively. The calculated  $\Delta G_{\text{binding}}$  for each ligand is similar ( $-58.7 \pm 5.7 \text{ kJmol}^{-1}$   
175  $^1$  for morphine,  $-60.1 \pm 3.7 \text{ kJmol}^{-1}$  for fentanyl), suggesting that both ligands can bind via this  
176 aqueous route with similar ease. In the profile for morphine binding a small local minimum  
177 can be seen between 1.0 - 1.3 nm, indicating the extracellular vestibule site identified in the  
178 unbiased MD simulations (Fig 2D). In the profile for fentanyl binding no small local minimum  
179 indicative of binding to the extracellular vestibule is apparent.

180 The PMF profiles for morphine and fentanyl binding via the lipid pathway are shown in Fig 4C  
181 and D. For morphine, the PMF profile follows a steep curve, with a calculated  $\Delta G_{\text{binding}}$  of  $-45.3$   
182  $\pm 1.8 \text{ kJmol}^{-1}$ . In contrast, the fentanyl  $\Delta G_{\text{binding}}$  is significantly lower ( $-14.4 \pm 0.8 \text{ kJmol}^{-1}$ ), with  
183 two local minima at 0 – 0.8 nm and 1.1 – 1.5 nm, corresponding to the orthosteric site and  
184 the TM6/7 interface (Fig 2D) on the lipid-facing side of the helices, respectively.

## 185 **Comparison of free energy landscapes for morphine and fentanyl**

186 In order to compare the full binding pathways from solvent to MOPr for fentanyl and  
187 morphine, we used the data from the PMF analyses in Fig 1D and 4 to construct free energy  
188 landscapes for both ligands in their protonated forms as they interact with MOPr (Fig 5).  
189 Figure 5A shows a thermodynamic cycle for each ligand, where  $\Delta G_1$  is free energy of transfer  
190 between the receptor and the membrane, as measured in Fig 4 C and D,  $\Delta G_2$  is between the  
191 membrane and solvent, as per Fig 1D,  $\Delta G_3$  is the energy of moving in the solvent (assumed to  
192 be  $0 \text{ kJ mol}^{-1}$ ) and  $\Delta G_{\text{direct}}$  represents the aqueous pathway from solvent to orthosteric binding  
193 site in the receptor explored in Fig 4A and B. From this, we can state that:

$$194 \quad \Delta G_{\text{direct}} = \Delta G_1 + \Delta G_2 + \Delta G_3 = \Delta G_1 + \Delta G_2$$

195 As can be seen in Fig 5B, this indeed holds up, and the energies we have obtained here agree  
196 whether measured for the direct binding route or the indirect route, via the membrane.  
197 Importantly, whilst the overall binding energy for each ligand is very similar, the primary  
198 difference is the increased preference of fentanyl to partition into the lipid membrane (Fig  
199 5C) where it can access the lipophilic access route. This suggests that fentanyl may favour this  
200 indirect, lipid access route, whereas morphine, which does not penetrate into the lipid,  
201 favours the “canonical” pathway, binding directly from the aqueous solvent.

## 202 **Discussion**

203 Here, we applied CG MD simulations to study the interactions of both fentanyl and morphine  
204 with the MOPr. Using a combination of unbiased MD simulations and free energy calculations,  
205 we demonstrate that fentanyl exhibits a marked preference to access the MOPr orthosteric  
206 site via a novel binding route through the lipid membrane and MOPr transmembrane helices

207 (Fig 6). Whereas, morphine accesses the orthosteric pocket by diffusing directly from the  
208 aqueous solvent and an extracellular vestibule site. Free energy calculations show that whilst  
209 fentanyl can also bind to the MOPr via the canonical aqueous route, fentanyl's preference for  
210 the lipid access route is driven by its high lipid solubility; fentanyl rapidly partitions into the  
211 lipid membrane and clusters around the MOPr. In contrast, morphine only diffuses as far as  
212 the lipid surface. Once positioned at the TM6/TM7 lipid-facing interface, fentanyl interacts  
213 with hydrophobic and aromatic residues to induce formation of a gap through which it gains  
214 access to the MOPr orthosteric site.

215 By using CG representation of our MOPr-ligand systems, we have captured ligand binding to  
216 the MOPr in a truly unbiased fashion, without the need for very longtime scale simulations  
217 (32) or use of any external potential or metadynamics approach (31). Combining our unbiased  
218 CG trajectories with steered MD and umbrella sampling to calculate the free energy  
219 landscapes of the binding events has proved a powerful tool for interrogating opioid ligand  
220 binding pathways.

221 Due to the lower resolution of the coarse-grained MD employed in this study, the two ligands  
222 represent multiple "fentanyl" or "morphinan" molecules. It is likely that other fentanyl  
223 analogues with high lipophilicity also exhibit lipid phase binding to the MOPr, for instance  
224 carfentanil, sufentanil and ohmefentanyl. The size of the fentanyl-induced gap between TM6  
225 and 7 would suggest that fentanyl's ability to bind via the lipid is a property of both its high  
226 lipophilicity and the elongated, flexible structure. Morphine, which is less lipid soluble, does  
227 not penetrate into the lipid far enough to access the gap, and is therefore unlikely to favour  
228 this binding pathway.

229 It is increasingly appreciated that GPCR ligands can bind to a variety of topographically distinct  
230 sites within the receptor structure (49). Allosteric binding pockets have been identified within  
231 the extracellular vestibule (50, 51), lipid-facing portions of the transmembrane helices (52),  
232 and the intracellular G protein coupling region (53), spanning the entire bilayer (54). Similarly,  
233 metastable sites populated as ligands bind and unbind between the orthosteric pocket and  
234 the aqueous phase have been identified, and it seems likely that for Class A GPCRs which  
235 recognise small molecule ligands, some of these sites may be conserved. Indeed, the  
236 extracellular vestibule to which morphine initially binds in our MD simulations appears to be  
237 analogous to the vestibule sites in the  $\beta 1$  and  $\beta 2$  adrenergic (32) and M3 muscarinic receptors  
238 (33). In extensive, all-atom simulations of MOPr in the presence of a high concentration of  
239 oliceridine, the ligand was also observed to bind to sites in the extracellular portion of the  
240 receptor (30).

241 A lipid phase binding route has been proposed for other GPCRs; notably rhodopsin and the  
242 CB2 cannabinoid, sphingosine-1-phosphate, PAR1 and P2Y1 receptors (34-37, 55), though not  
243 so far for the MOPr which has evolved to recognise non-lipophilic peptide ligands. Like  
244 fentanyl at MOPr, 2-arachidonoylglycerol and vorapaxar are reported to access the  
245 orthosteric pocket via the TM6/7 interfaces of the CB2 and PAR1 receptors, respectively (34,  
246 35). Particularly, in simulations of vorapaxar unbinding from the PAR1 receptor, the ligand  
247 also exits via a gap formed by TM6/7 and ECL3, towards the extracellular side of the receptor  
248 (35). Similar to the MOPr, this gap is lined by small hydrophobic and polar residues and an  
249 aromatic residue in position 7.35 (tryptophan in MOPr, tyrosine in PAR1). In the CB2 receptor,  
250 the ligand entry gap is further towards the intracellular side of TM6 and 7 (34).

251 Interestingly, the novel binding mode we observe here may be specific to the MOPr over the  
252  $\delta$ -opioid receptor (DOPr). Fentanyl is highly selective for MOPr over the DOPr (56). Where the  
253 residues lining the TM6/7 gap in the MOPr are largely small polar, hydrophobic or aromatic  
254 side chains, in the DOPr ECL3 contains two positively charged and bulky arginine residues  
255 (R291 and R292) which may impede fentanyl binding by both repulsion of the protonated  
256 nitrogen and steric hinderance.

257 This novel mechanism of interaction with MOPr is of great importance to our understanding  
258 of the pharmacology of fentanyl.

259 Firstly, by concentrating fentanyl in the lipid membrane, the apparent concentration around  
260 the receptor is markedly increased, as the membrane acts as a reservoir. This high local  
261 concentration increases the likelihood of receptor association. Therefore, whilst morphine  
262 and fentanyl have very similar binding energies for MOPr, the actual likelihood of fentanyl  
263 binding would be far higher, and this might well explain the increased potency of fentanyl  
264 over morphine, particularly in cells where a complete, intact cell membrane is present.

265 Secondly, once fentanyl has partitioned into the bilayer it will switch from 3D diffusion in the  
266 solvent to 2D, lateral diffusion in the membrane (57). This reduction in dimensionality results  
267 in fentanyl having a greater chance of finding the receptor target, compared to morphinan  
268 ligands exhibiting 3D diffusion in the aqueous phase. Similarly, the membrane may also serve  
269 to organise the fentanyl molecules at a depth and orientation which favours MOPr binding  
270 through the TM6/7 interface (54).

271 Our identification of the TM6/7 metastable interface on the outside of the MOPr helices also  
272 invites the possibility that fentanyl exhibits “exosite” binding and re-binding, as described by  
273 Vauquelin & Charlton (58). Unlike morphinan ligands which bind and unbind via the aqueous

274 phase, fentanyl is not free to diffuse away from MOPr and instead binds to the “exosite”  
275 TM6/7 interface. From here, fentanyl can then rapidly and efficiently rebind to the orthosteric  
276 site.

277 The mechanisms outlined here may also explain the poor reversibility of fentanyls by the  
278 morphinan antagonist naloxone. Naloxone has similar lipid solubility to morphine and is  
279 therefore unlikely to concentrate in the bilayer or have access to the lipid phase binding route  
280 and TM6/7 exosite (Fig 6). It would therefore only compete with fentanyl for binding via the  
281 aqueous route, not the lipophilic route. Whilst naloxone can still compete with fentanyl to  
282 occupy the orthosteric pocket, fentanyl can remain bound to the TM6/7 exosite and thus  
283 rapidly rebind to the orthosteric site once naloxone has dissociated. A similar phenomenon  
284 has been demonstrated for the lipophilic  $\beta 2$  adrenergic receptor agonist, salmeterol, where  
285 the ligand may be retained in the lipid membrane allowing reassertion of its agonist effects  
286 after wash-out (59, 60).

287 Fentanyl and other synthetic opioid agonists are driving the current opioid overdose epidemic  
288 in the United States (61). Fentanyl’s rapid onset and high potency are compounded by poor  
289 naloxone-reversibility, making the risk of fentanyl overdose high. Only by understanding fully  
290 how fentanyl interacts with and activates MOPr will we be able to develop better antagonists.  
291 We have previously shown that fentanyl-induced respiratory depression in mice is poorly  
292 reversed by naloxone compared to that by morphine. In light of these MD data, this is hardly  
293 surprising given that naloxone has low lipid solubility. However, we have also shown that the  
294 more lipophilic antagonist diprenorphine is better able to antagonize the effects of fentanyl  
295 (11). This might suggest that diprenorphine can at least access the entry point in the TM  
296 domains to block fentanyl access. Whilst elucidating how diprenorphine and other lipophilic

297 ligands interact with the MOPr requires further study, the development of lipophilic MOPr

298 antagonists may prove highly beneficial in combatting fentanyl overdose.

299

## 300 **Methods**

### 301 **System set-up**

302 The MOPr model was taken from the inactive, antagonist-bound crystal structure (26) (PDB:  
303 4DKL), with the T4 lysozyme and ligands removed, and the missing intracellular loop 3  
304 modelled using Insight II, as described in (45). The protein structure coordinates were then  
305 converted to coarse-grained MARTINI 2.2 representation using the *martinize* script (62). The  
306 secondary structure was constrained using an elastic network between backbone (BB) beads;  
307 elastic bonds with a force constant of  $100 \text{ kJ mol}^{-1}\text{nm}^{-2}$  were defined between  $\text{BB}_i\text{-BB}_{i+4}$  helix  
308 atoms,  $\text{BB}_i\text{-BB}_{i+10}$  helix atoms, and BB atom pairs with low root mean square fluctuation and  
309 highly correlated motion as determined from all-atom MD simulations. All MD simulations  
310 were run using GROMACS 2019.2 (63).

311 To parameterise morphine and fentanyl in MARTINI, firstly,  $1 \mu\text{s}$  all-atom MD simulations of  
312 fentanyl or morphine in water and 0.15 M NaCl were conducted under the Amber ff99SB-ildn  
313 force field (64). Ligands were parameterised using acpype/Antechamber and the General  
314 Amber Force Field (65). Atom-to-bead mapping for morphine and fentanyl was then created  
315 as shown in Supplementary Fig 1A and B, respectively. The CG ligands were then solvated in  
316 water and 0.15 M NaCl, energy minimized for 10000 steps using the steepest descents  
317 algorithm, box dimensions and temperature equilibrated, and then production MD was run  
318 for  $1 \mu\text{s}$ . Bond lengths and angles were measured and compared to the all-atom simulations,  
319 to determine appropriate mapping and bonded terms.

320

321



## 322 **Unbiased CG simulations**

323 The CG MOPr model was then embedded in a POPC:POPE:cholesterol lipid bilayer (ratio 5:5:1)  
324 using the *insane* script (66), and solvated in water, 0.15 M NaCl and 6 molecules of opioid  
325 ligand. The starting size of the system box was 15 x 15 x 15 nm<sup>3</sup>. Systems were first energy  
326 minimized over 50000 steps using the steepest descents algorithm, then equilibrated under  
327 NVT ensemble and then NPT ensembles, before production MD simulations were run at 310  
328 K with a 10 fs timestep. The temperature and pressure were controlled by the V-rescale  
329 thermostat and Parrinello-Rahman barostat, respectively. Simulations were performed for up  
330 to 5  $\mu$ s; the exact simulation lengths for each ligand are shown in Supplementary Table 1.

331 All simulations were analysed using the GROMACS suite of tools (63). Unless otherwise stated,  
332 all analyses were performed using the entire production trajectories. Data were plotted in  
333 GraphPad Prism v8, and images made in VMD (47).

## 334 **Free energy calculations**

335 For the membrane/solvent partitioning calculations, systems were set up with small (5 x 5 x  
336 10 nm<sup>3</sup>) membrane patches containing 32 POPE, 32 POPC and 6 cholesterol molecules, and  
337 solvated in 0.15 M NaCl. One molecule of either protonated fentanyl, neutral fentanyl,  
338 protonated morphine or neutral morphine was placed in the bilayer center. The systems were  
339 minimized for 50000 steps, keeping the ligand restrained. To generate the starting  
340 conformations for umbrella sampling, steered MD simulations were performed. Ligands were  
341 pulled from the bilayer center into the solvent (46), in a direction defined by the vector  
342 between the centers of mass of the ligand and the PO4 lipid beads, at a rate of 0.1 nm ns<sup>-1</sup>  
343 and a force constant of 1000 kJ mol<sup>-1</sup> nm<sup>-2</sup>.

344 For the ligand binding calculations, the final frames from the unbiased CG simulations with  
345 morphine or fentanyl bound in the orthosteric pocket were taken as the starting  
346 conformations. All other unbound ligands were removed, and the receptor-ligand complex  
347 was re-embedded in a smaller lipid bilayer (10 x 10 x 10 nm<sup>3</sup>). Steered MD simulations were  
348 performed to generate the starting conformations for umbrella sampling. In each case,  
349 separate simulations were performed to pull morphine or fentanyl from the orthosteric  
350 pocket along a) the aqueous / extracellular route, and b) the lipophilic / transmembrane  
351 domain route. The reaction coordinate was defined as the distance between the center of  
352 mass of the ligand and the receptor. Ligands were pulled at a rate of 0.1 nm ns<sup>-1</sup> and a force  
353 constant of 1000 kJ mol<sup>-1</sup> nm<sup>-2</sup>, with a 1000 kJ mol<sup>-1</sup> nm<sup>-2</sup> position restraint on 4 backbone  
354 beads (D114<sup>2,50</sup>, D147<sup>3,32</sup>, N150<sup>3,35</sup> and S154<sup>3,39</sup>) of the MOPr to prevent translation or rotation  
355 of the receptor.

356 The starting conformations for umbrella sampling were extracted from these steered MD  
357 trajectories at 0.05 nm intervals along the reaction coordinate, generating ~80 umbrella  
358 sampling windows for each calculation. Each was subjected to 1 μs MD simulations, with a  
359 harmonic restraint of 1000 kJ mol<sup>-1</sup> nm<sup>-2</sup> to maintain the separation between the centers of  
360 mass of the ligand and PO4 beads (membrane partitioning calculations) or protein (ligand  
361 binding calculations). The PMFs were then extracted using the Weighted Histogram Analysis  
362 Method (WHAM) in GROMACS (67). PMFs were plotted as the average profile with statistical  
363 error calculated from bootstrap analysis. For the ligand binding calculations, ΔG<sub>binding</sub> for each  
364 ligand in each binding pathway was calculated as the difference between the ligand-bound  
365 and final unbound states.

366

367 **References**

- 368 1. Lamy FR, Daniulaityte R, Barratt MJ, Lokala U, Sheth A, Carlson RG. Listed for sale: analyzing  
369 data on fentanyl, fentanyl analogs and other novel synthetic opioids on one cryptomarket.  
370 Drug Alcohol Depend. 2020;213:108115.
- 371 2. Brunetti P, Pirani F, Carlier J, Giorgetti R, Busardo FP, Lo Faro AF. A 2017-2019 update on  
372 acute intoxications and fatalities from illicit fentanyl and analogues. J Anal Toxicol. 2020.
- 373 3. Wilson N, Kariisa M, Seth P, Smith Ht, Davis NL. Drug and opioid-involved overdose deaths  
374 - United States, 2017-2018. MMWR Morb Mortal Wkly Rep. 2020;69(11):290-7.
- 375 4. Fairbairn N, Coffin PO, Walley AY. Naloxone for heroin, prescription opioid, and illicitly  
376 made fentanyl overdoses: challenges and innovations responding to a dynamic epidemic. Int  
377 J Drug Policy. 2017;46:172-9.
- 378 5. Rzasalynn R, Galinkin JL. Naloxone dosage for opioid reversal: current evidence and clinical  
379 implications. Ther Adv Drug Saf. 2018;9(1):63-88.
- 380 6. Peterson AB, Gladden RM, Delcher C, Spies E, Garcia-Williams A, Wang Y, et al. Increases in  
381 fentanyl-related overdose deaths - Florida and Ohio, 2013-2015. MMWR Morb Mortal Wkly  
382 Rep. 2016;65(33):844-9.
- 383 7. Schumann H, Erickson T, Thompson TM, Zautcke JL, Denton JS. Fentanyl epidemic in  
384 Chicago, Illinois and surrounding Cook County. Clin Toxicol (Phila). 2008;46(6):501-6.
- 385 8. Somerville NJ, O'Donnell J, Gladden RM, Zibbell JE, Green TC, Younkin M, et al.  
386 Characteristics of fentanyl overdose - Massachusetts, 2014-2016. MMWR Morb Mortal Wkly  
387 Rep. 2017;66(14):382-6.

- 388 9. Mayer S, Boyd J, Collins A, Kennedy MC, Fairbairn N, McNeil R. Characterizing fentanyl-  
389 related overdoses and implications for overdose response: Findings from a rapid  
390 ethnographic study in Vancouver, Canada. *Drug Alcohol Depend.* 2018;193:69-74.
- 391 10. Moss RB, Carlo DJ. Higher doses of naloxone are needed in the synthetic opioid era. *Subst*  
392 *Abuse Treat Prev Policy.* 2019;14(1):6.
- 393 11. Hill R, Santhakumar R, Dewey W, Kelly E, Henderson G. Fentanyl depression of respiration:  
394 Comparison with heroin and morphine. *British journal of pharmacology.* 2020;177(2):254-66.
- 395 12. Ritter JM, Flower RJ, Henderson G, Loke YK, MacEwan D, Rang HP. Rang and Dale's  
396 *Pharmacology.* 9th ed. ed. London: Elsevier; 2019.
- 397 13. Kosterlitz HW, Leslie FM. Comparison of the receptor binding characteristics of opiate  
398 agonists interacting with mu- or kappa-receptors. *British journal of pharmacology.*  
399 1978;64(4):607-14.
- 400 14. Traynor JR, Nahorski SR. Modulation by mu-opioid agonists of guanosine-5'-O-(3-  
401 [35S]thio)triphosphate binding to membranes from human neuroblastoma SH-SY5Y cells.  
402 *Molecular pharmacology.* 1995;47(4):848-54.
- 403 15. McPherson J, Rivero G, Baptist M, Llorente J, Al-Sabah S, Krasel C, et al. mu-opioid  
404 receptors: correlation of agonist efficacy for signalling with ability to activate internalization.  
405 *Molecular pharmacology.* 2010;78(4):756-66.
- 406 16. Schmid CL, Kennedy NM, Ross NC, Lovell KM, Yue Z, Morgenweck J, et al. Bias factor and  
407 therapeutic window correlate to predict safer opioid analgesics. *Cell.* 2017;171(5):1165-75  
408 e13.

- 409 17. Gillis A, Gondin AB, Kliewer A, Sanchez J, Lim HD, Alamein C, et al. Low intrinsic efficacy  
410 for G protein activation can explain the improved side effect profiles of new opioid agonists.  
411 *Sci Signal*. 2020;13(625).
- 412 18. Crowley RS, Riley AP, Alder AF, Anderson RJ, 3rd, Luo D, Kaska S, et al. Synthetic studies  
413 of neoclerodane diterpenes from *salvia divinorum*: design, synthesis, and evaluation of  
414 analogues with improved potency and G-protein activation bias at the mu-opioid receptor.  
415 *ACS Chem Neurosci*. 2020;11(12):1781-90.
- 416 19. Zebala JA, Schuler AD, Kahn SJ, Maeda DY. Desmetramadol is identified as a G-protein  
417 biased mu-opioid receptor agonist. *Front Pharmacol*. 2019;10:1680.
- 418 20. Manabe S, Miyano K, Fujii Y, Ohshima K, Yoshida Y, Nonaka M, et al. Possible biased  
419 analgesic of hydromorphone through the G protein-over beta-arrestin-mediated pathway:  
420 cAMP, CellKey, and receptor internalization analyses. *J Pharmacol Sci*. 2019;140(2):171-7.
- 421 21. Comer SD, Cahill CM. Fentanyl: Receptor pharmacology, abuse potential, and implications  
422 for treatment. *Neurosci Biobehav Rev*. 2019;106:49-57.
- 423 22. Pathan H, Williams J. Basic opioid pharmacology: an update. *Br J Pain*. 2012;6(1):11-6.
- 424 23. Vauquelin G. Cell membranes... and how long drugs may exert beneficial pharmacological  
425 activity in vivo. *Br J Clin Pharmacol*. 2016;82(3):673-82.
- 426 24. Gherbi K, Briddon SJ, Charlton SJ. Micro-pharmacokinetics: Quantifying local drug  
427 concentration at live cell membranes. *Sci Rep*. 2018;8(1):3479.
- 428 25. Faulkner C, Santos-Carballal D, Plant DF, de Leeuw NH. Atomistic molecular dynamics  
429 simulations of propofol and fentanyl in phosphatidylcholine lipid bilayers. *ACS Omega*.  
430 2020;5(24):14340-53.

- 431 26. Manglik A, Kruse AC, Kobilka TS, Thian FS, Mathiesen JM, Sunahara RK, et al. Crystal  
432 structure of the mu-opioid receptor bound to a morphinan antagonist. *Nature*.  
433 2012;485(7398):321-6.
- 434 27. Huang W, Manglik A, Venkatakrisnan AJ, Laeremans T, Feinberg EN, Sanborn AL, et al.  
435 Structural insights into mu-opioid receptor activation. *Nature*. 2015;524(7565):315-21.
- 436 28. Koehl A, Hu H, Maeda S, Zhang Y, Qu Q, Paggi JM, et al. Structure of the mu-opioid  
437 receptor-Gi protein complex. *Nature*. 2018;558(7711):547-52.
- 438 29. Ballesteros JA, Weinstein H. Integrated methods for the construction of three-dimensional  
439 models and computational probing of structure-function relations in G protein-coupled  
440 receptors. *Methods Neurosci* 1995;25:366–428.
- 441 30. Schneider S, Provasi D, Filizola M. How oliceridine (TRV-130) binds and stabilizes a mu-  
442 opioid receptor conformational state that selectively triggers G protein signaling pathways.  
443 *Biochemistry*. 2016;55(46):6456-66.
- 444 31. Schneider S, Provasi D, Filizola M. The dynamic process of drug-GPCR binding at either  
445 orthosteric or allosteric sites evaluated by metadynamics. *Methods Mol Biol*. 2015;1335:277-  
446 94.
- 447 32. Dror RO, Pan AC, Arlow DH, Borhani DW, Maragakis P, Shan Y, et al. Pathway and  
448 mechanism of drug binding to G-protein-coupled receptors. *Proceedings of the National*  
449 *Academy of Sciences of the United States of America*. 2011;108(32):13118-23.
- 450 33. Kruse AC, Hu J, Pan AC, Arlow DH, Rosenbaum DM, Rosemond E, et al. Structure and  
451 dynamics of the M3 muscarinic acetylcholine receptor. *Nature*. 2012;482(7386):552-6.

- 452 34. Hurst DP, Grossfield A, Lynch DL, Feller S, Romo TD, Gawrisch K, et al. A lipid pathway for  
453 ligand binding is necessary for a cannabinoid G protein-coupled receptor. *The Journal of*  
454 *biological chemistry*. 2010;285(23):17954-64.
- 455 35. Bokoch MP, Jo H, Valcourt JR, Srinivasan Y, Pan AC, Capponi S, et al. Entry from the lipid  
456 bilayer: a possible pathway for inhibition of a peptide G protein-coupled receptor by a  
457 lipophilic small molecule. *Biochemistry*. 2018;57(39):5748-58.
- 458 36. Hanson MA, Roth CB, Jo E, Griffith MT, Scott FL, Reinhart G, et al. Crystal structure of a  
459 lipid G protein-coupled receptor. *Science*. 2012;335(6070):851-5.
- 460 37. Yuan X, Raniolo S, Limongelli V, Xu Y. The molecular mechanism underlying ligand binding  
461 to the membrane-embedded site of a G-protein-coupled receptor. *J Chem Theory Comput*.  
462 2018;14(5):2761-70.
- 463 38. Shaw DE, Deneroff MM, Dror RO, Kuskin JS, Larson RH, Salmon JK, et al. Anton, a special-  
464 purpose machine for molecular dynamics simulation. *Communications of the ACM*.  
465 2008;51(7):91-7.
- 466 39. Monticelli L, Kandasamy SK, Periole X, Larson RG, Tieleman DP, Marrink SJ. The MARTINI  
467 coarse-grained force field: extension to proteins. *J Chem Theory Comput*. 2008;4(5):819-34.
- 468 40. Marrink SJ, Risselada HJ, Yefimov S, Tieleman DP, de Vries AH. The MARTINI force field:  
469 coarse grained model for biomolecular simulations. *The journal of physical chemistry B*.  
470 2007;111(27):7812-24.
- 471 41. Song W, Yen HY, Robinson CV, Sansom MSP. State-dependent lipid interactions with the  
472 A2A receptor revealed by MD simulations using in vivo-mimetic membranes. *Structure*.  
473 2019;27(2):392-403 e3.

- 474 42. Souza PCT, Thallmair S, Conflitti P, Ramirez-Palacios C, Alessandri R, Raniolo S, et al.  
475 Protein-ligand binding with the coarse-grained Martini model. *Nature communications*.  
476 2020;11(1):3714.
- 477 43. Corey RA, Vickery ON, Sansom MSP, Stansfeld PJ. Insights into membrane protein-lipid  
478 interactions from free energy calculations. *J Chem Theory Comput*. 2019;15(10):5727-36.
- 479 44. Dekan Z, Sianati S, Yousuf A, Sutcliffe KJ, Gillis A, Mallet C, et al. A novel tetrapeptide class  
480 of biased analgesics from an Australian fungus targets the mu-opioid receptor. *Proceedings*  
481 *of the National Academy of Sciences of the United States of America*. 2019;In submission.
- 482 45. Sutcliffe KJ, Henderson G, Kelly E, Sessions RB. Drug binding poses relate structure with  
483 efficacy in the mu opioid receptor. *Journal of molecular biology*. 2017;429(12):1840-51.
- 484 46. Filipe HA, Moreno MJ, Rog T, Vattulainen I, Loura LM. How to tackle the issues in free  
485 energy simulations of long amphiphiles interacting with lipid membranes: convergence and  
486 local membrane deformations. *The journal of physical chemistry B*. 2014;118(13):3572-81.
- 487 47. Humphrey W, Dalke A, Schulten K. VMD: visual molecular dynamics. *Journal of molecular*  
488 *graphics*. 1996;14(1):33-8, 27-8.
- 489 48. Granier S, Kobilka B. A new era of GPCR structural and chemical biology. *Nature chemical*  
490 *biology*. 2012;8(8):670-3.
- 491 49. Lu S, Zhang J. Small molecule allosteric modulators of G-protein-coupled receptors: drug-  
492 target interactions. *Journal of medicinal chemistry*. 2019;62(1):24-45.
- 493 50. Kruse AC, Ring AM, Manglik A, Hu J, Hu K, Eitel K, et al. Activation and allosteric modulation  
494 of a muscarinic acetylcholine receptor. *Nature*. 2013;504(7478):101-6.



- 495 51. Shang Y, Yeatman HR, Provasi D, Alt A, Christopoulos A, Canals M, et al. Proposed mode  
496 of binding and action of positive allosteric modulators at opioid receptors. *ACS Chem Biol.*  
497 2016;11(5):1220-9.
- 498 52. Cheng RKY, Fiez-Vandal C, Schlenker O, Edman K, Aggeler B, Brown DG, et al. Structural  
499 insight into allosteric modulation of protease-activated receptor 2. *Nature.*  
500 2017;545(7652):112-5.
- 501 53. Liu X, Ahn S, Kahsai AW, Meng KC, Latorraca NR, Pani B, et al. Mechanism of intracellular  
502 allosteric beta2AR antagonist revealed by X-ray crystal structure. *Nature.*  
503 2017;548(7668):480-4.
- 504 54. Szlenk CT, Gc JB, Natesan S. Does the lipid bilayer orchestrate access and binding of ligands  
505 to transmembrane orthosteric/allosteric sites of G protein-coupled receptors? *Molecular*  
506 *pharmacology.* 2019;96(5):527-41.
- 507 55. Hildebrand PW, Scheerer P, Park JH, Choe HW, Piechnick R, Ernst OP, et al. A ligand  
508 channel through the G protein coupled receptor opsin. *PloS one.* 2009;4(2):e4382.
- 509 56. Toll L, Berzetei-Gurske IP, Polgar WE, Brandt SR, Adapa ID, Rodriguez L, et al. Standard  
510 binding and functional assays related to medications development division testing for  
511 potential cocaine and opiate narcotic treatment medications. *NIDA research monograph.*  
512 1998;178:440-66.
- 513 57. Vauquelin G, Packeu A. Ligands, their receptors and ... plasma membranes. *Mol Cell*  
514 *Endocrinol.* 2009;311(1-2):1-10.
- 515 58. Vauquelin G, Charlton SJ. Long-lasting target binding and rebinding as mechanisms to  
516 prolong in vivo drug action. *British journal of pharmacology.* 2010;161(3):488-508.

- 517 59. Anderson GP, Linden A, Rabe KF. Why are long-acting beta-adrenoceptor agonists long-  
518 acting? *Eur Respir J.* 1994;7(3):569-78.
- 519 60. Lindén A, Bergendal A, Ullman A, Skoogh B-E, Löfdahl C-G. High concentration of  
520 formoterol and salmeterol in the isolated guinea-pig trachea: reassertion of smooth muscle  
521 relaxation after beta blockade followed by washout. *Am Rev Respir Dis.* 1990;143(4(2)):A749.
- 522 61. Gladden RM, Martinez P, Seth P. Fentanyl law enforcement submissions and increases in  
523 synthetic opioid-involved overdose deaths - 27 states, 2013-2014. *MMWR Morb Mortal Wkly*  
524 *Rep.* 2016;65(33):837-43.
- 525 62. de Jong DH, Singh G, Bennett WF, Arnarez C, Wassenaar TA, Schafer LV, et al. Improved  
526 parameters for the martini coarse-grained protein force field. *J Chem Theory Comput.*  
527 2013;9(1):687-97.
- 528 63. Abraham MJ, Murtola T, Schulz R, Páll S, Smith JC, Hess B, et al. GROMACS: High  
529 performance molecular simulations through multi-level parallelism from laptops to  
530 supercomputers. *SoftwareX.* 2015;1-2:19-25.
- 531 64. Lindorff-Larsen K, Piana S, Palmo K, Maragakis P, Klepeis JL, Dror RO, et al. Improved side-  
532 chain torsion potentials for the Amber ff99SB protein force field. *Proteins.* 2010;78(8):1950-  
533 8.
- 534 65. Wang J, Wolf RM, Caldwell JW, Kollman PA, Case DA. Development and testing of a general  
535 amber force field. *J Comput Chem.* 2004;25(9):1157-74.
- 536 66. Wassenaar TA, Ingolfsson HI, Bockmann RA, Tieleman DP, Marrink SJ. Computational  
537 lipidomics with insane: a versatile tool for generating custom membranes for molecular  
538 simulations. *J Chem Theory Comput.* 2015;11(5):2144-55.

539 67. Hub JS, de Groot BL, van der Spoel D. g\_wham—a free weighted histogram analysis  
540 implementation including robust error and autocorrelation estimates. *Journal of Chemical*  
541 *Theory and Computation*. 2010;6(12):3713-20.

542

543 **Acknowledgements**

544 The work described in this paper was supported by a grant from the Medical Research Council  
545 (MR/S010890/1) to GH, EK and SJC and was carried out using the computational facilities of  
546 the Advanced Computing Research Centre, University of Bristol <http://www.bris.ac.uk/acrc/>.  
547 We thank Roseanna Jackson of Slowe Club for artwork.

548 **Author contributions**

549 KJS and RAC designed and performed the MD simulations. KJS, RAC and RBS analysed the  
550 data. GH, EK, SJC and KJS conceived the study. All authors contributed to and approved the  
551 content of the final manuscript.

552 **Competing Interests**

553 The authors declare no competing interests.

554

555 **Figures**

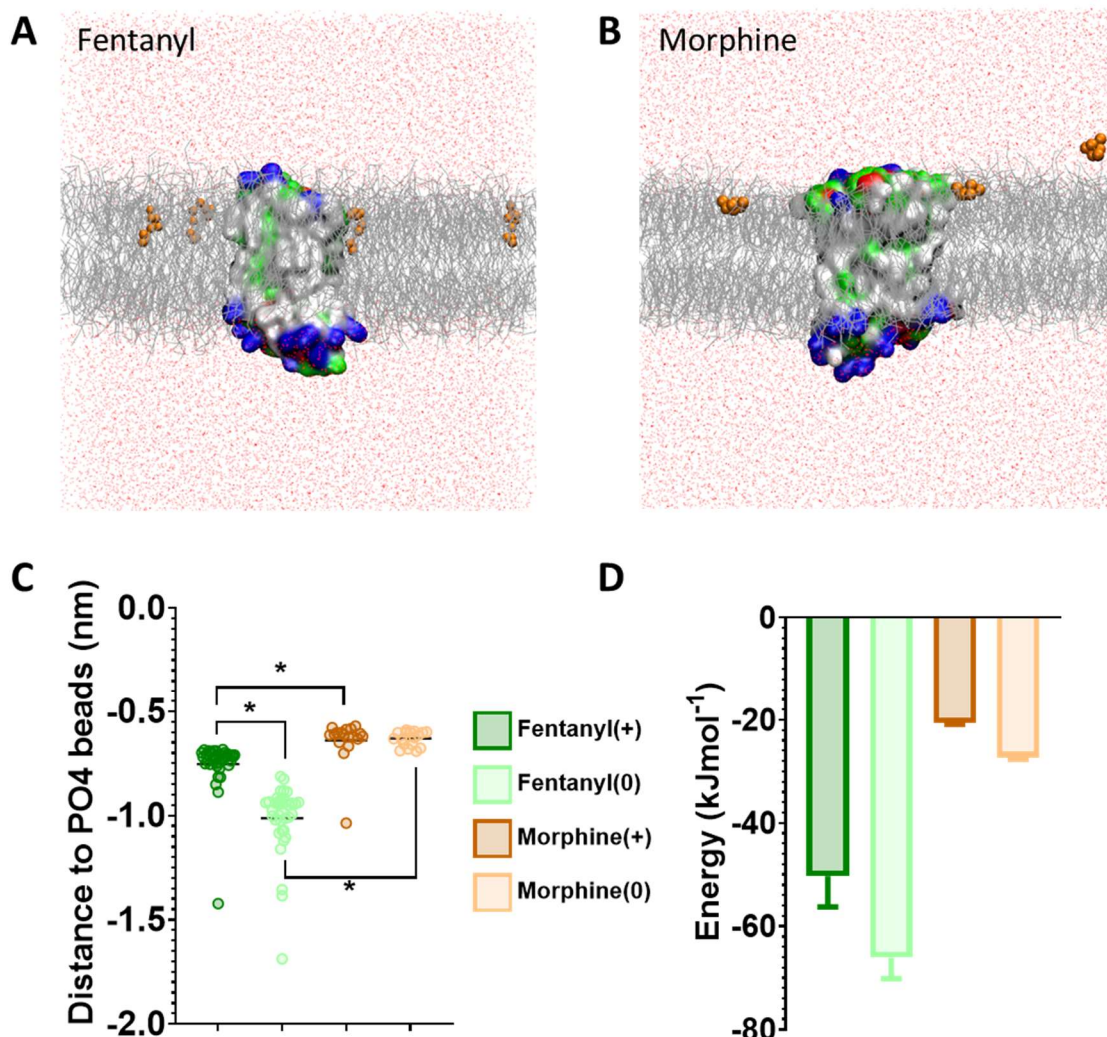

556  
557

558 **Figure. 1. Differences in how opioid ligands partition into the lipid bilayer**

559 **A.** Fentanyl molecules (orange) rapidly partition into the lipid membrane (grey). **B.** Morphine  
560 molecules (orange) do not fully enter the lipid membrane (grey) but interact with the charged  
561 lipid headgroups. Note while ligands can appear on either side of the bilayer due to the  
562 periodic boundary conditions applied in these simulations, for clarity only ligands in the upper  
563 leaflet of the membrane are shown. In no simulation did a ligand travel all the way through  
564 the bilayer. The protein is coloured according to residue properties (hydrophobic; grey, polar;  
565 green, acidic; red, basic; blue). **C.** Distance between the center of mass of the ligand and the  
566 phosphate head groups (PO4 beads) of the lipid bilayer. Both the charged and neutral forms  
567 of fentanyl partition significantly deeper in the membrane than morphine. \*  $p < 0.05$ , one-  
568 way ANOVA. Each data point represents the average distance between a fentanyl molecule  
569 and the PO4 beads over the entire simulation. **D.** Free energy change for ligands moving  
570 between the bilayer center and the aqueous solvent. Calculated from PMF profiles shown in  
571 Supplementary Fig 3B-E. Data plotted as mean  $\pm$  error calculated from bootstrap analysis.  
572

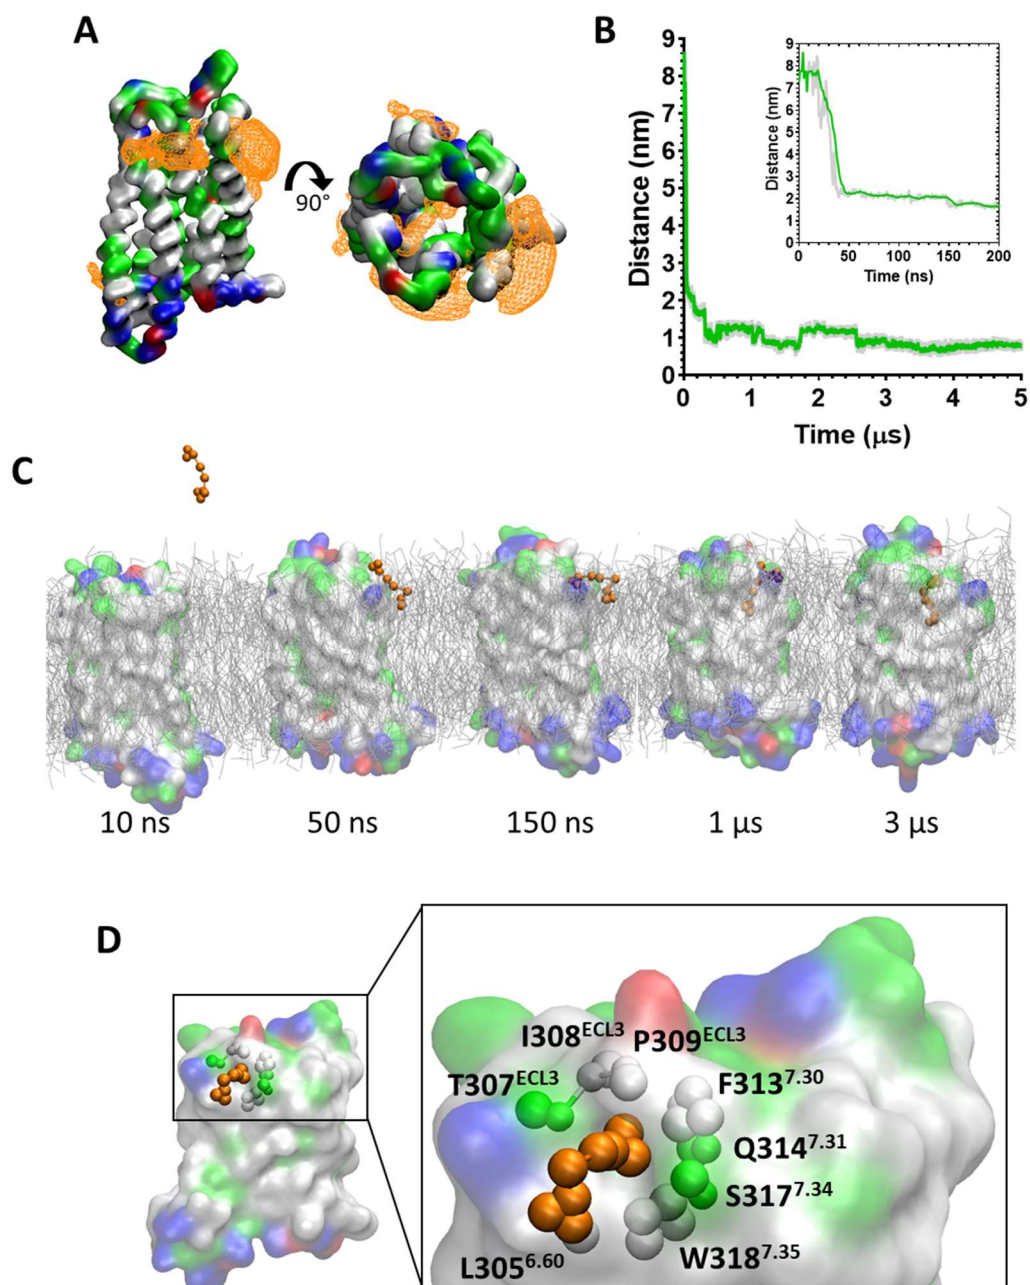

573

574 **Figure. 2. Fentanyl binds to the MOPr from the lipid phase, via a gap between TM6 and TM7**  
 575 **A.** Ligand density maps averaged over the 5  $\mu$ s simulation, show fentanyl densities around the  
 576 receptor transmembrane domains and within the orthosteric pocket (orange). The protein is  
 577 coloured according to residue properties (hydrophobic; grey, polar; green, acidic; red, basic;  
 578 blue). **B.** Distance between the Qd bead of fentanyl and the SC1 bead of D147<sup>3,32</sup> over the  
 579 entire 5  $\mu$ s and in the first 200 ns (inset). Data are presented as the raw values (grey) and  
 580 moving average over 10 frames (green). **C.** Snapshots from the unbiased simulation of fentanyl  
 581 binding to MOPr. Fentanyl moves from the aqueous solvent into the lipid bilayer, then  
 582 interacts with the MOPr transmembrane domains and induces the formation of a gap  
 583 between TM6 and 7, through which fentanyl accesses the orthosteric site. **D.** Fentanyl at the  
 584 TM6/7 interface. Fentanyl is depicted as orange beads, and the residues comprising the lipid  
 585 entry gap as coloured beads.

586

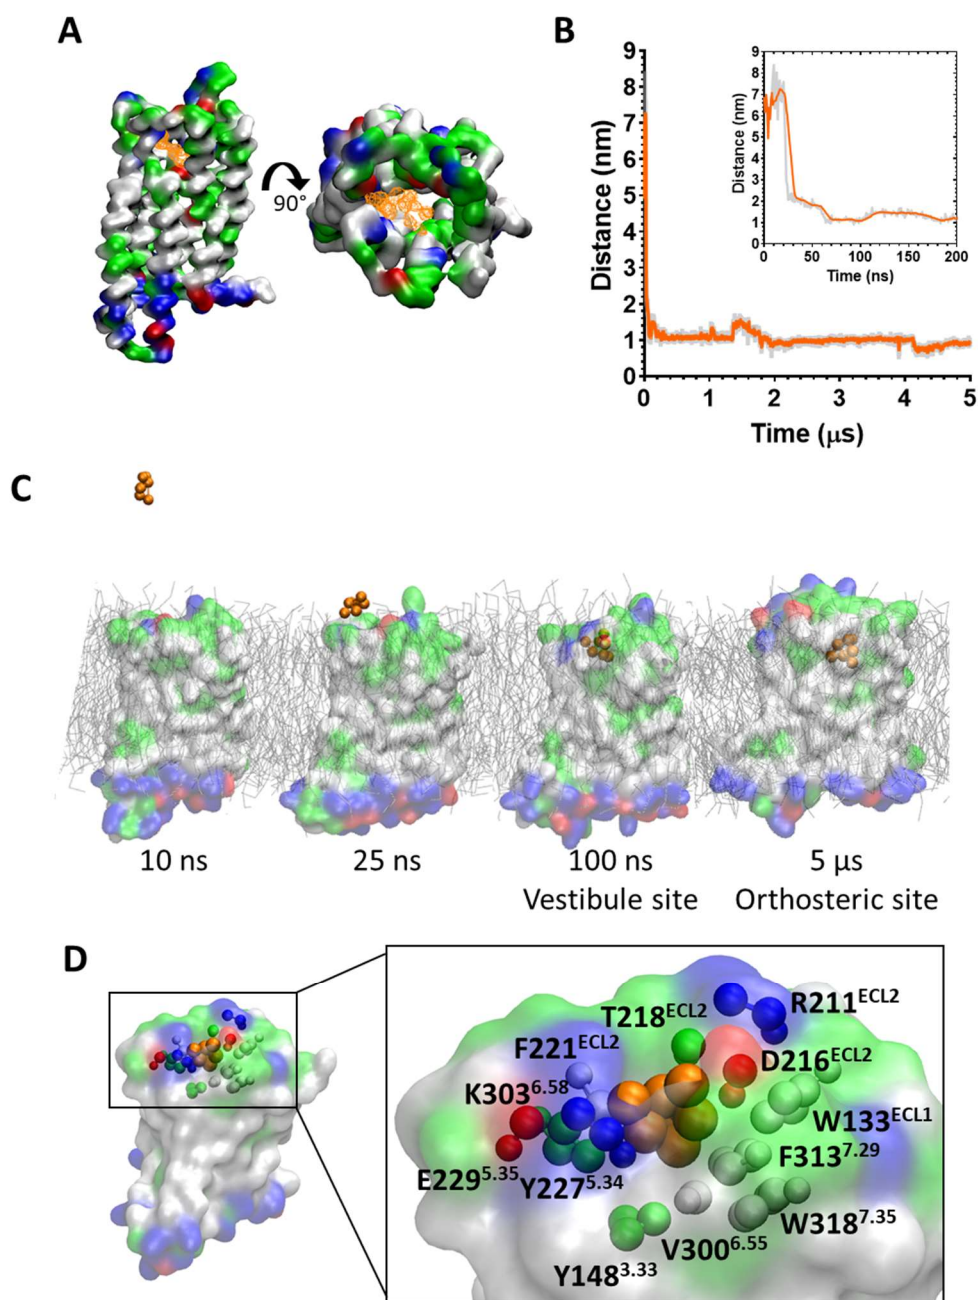

587

588 **Figure. 3. Morphine binds to the MOPr from the aqueous phase, via an extracellular**  
 589 **vestibule site**

590 **A.** Ligand density maps averaged over the 5  $\mu$ s simulation, show morphine densities above  
 591 and within the orthosteric pocket (orange). The protein is coloured according to residue  
 592 properties (hydrophobic; grey, polar; green, acidic; red, basic; blue). **B.** Distance between the  
 593 Qd bead of morphine and the SC1 bead of D147<sup>3,32</sup> over the entire 5  $\mu$ s and in the first 200 ns  
 594 (inset). Data are presented as the raw values (grey) and moving average over 10 frames  
 595 (orange). **C.** Snapshots from the unbiased simulation of morphine binding to MOPr. Morphine  
 596 moves from the aqueous solvent to an extracellular vestibule and finally the orthosteric site.  
 597 **D.** Morphine in the extracellular vestibule site. Morphine is depicted as orange beads, and the  
 598 residues comprising the vestibule site as coloured beads.

599

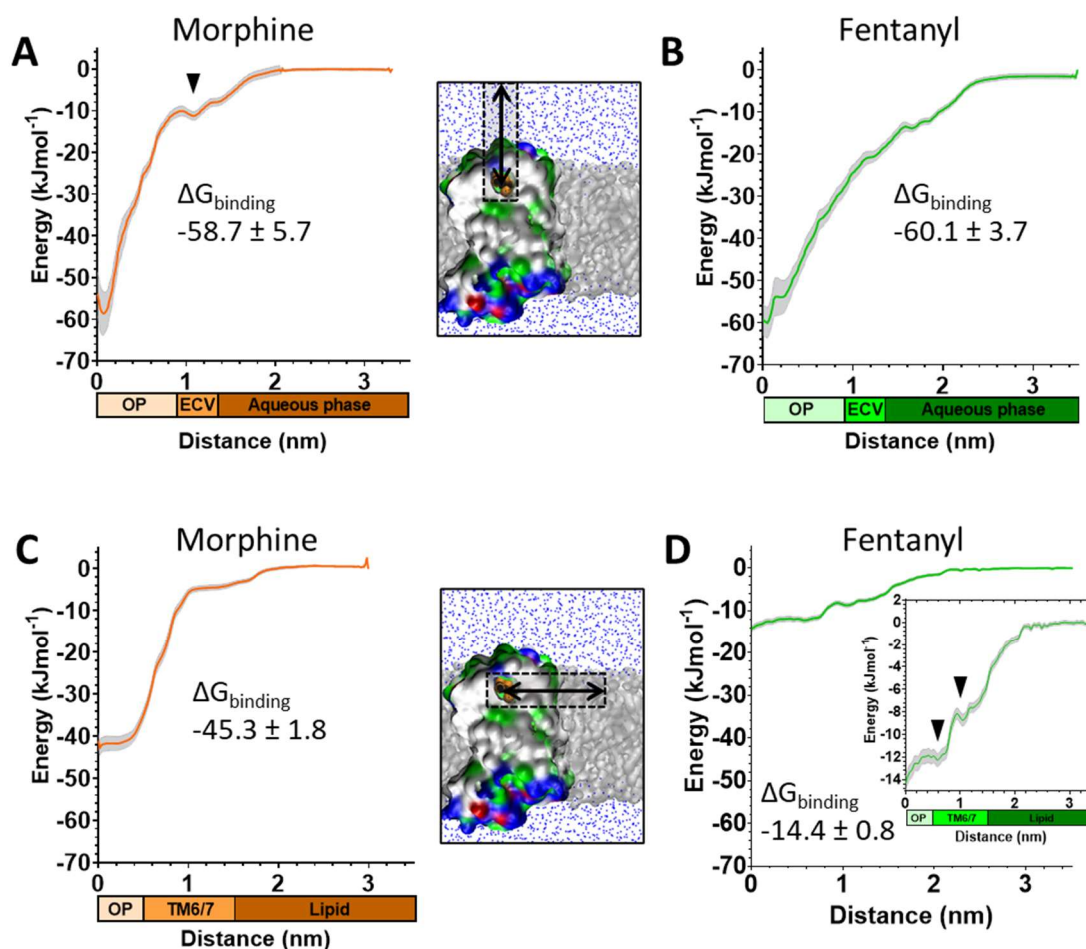

600

601 **Figure 4. Free energy calculations for ligand binding pathways**

602 Steered MD was used to recreate the spontaneous binding events reported in Figs 2 and 3.  
603 Umbrella sampling and the weighted histogram analysis method were then employed to  
604 determine the free energy of binding for each ligand in each pathway. In all plots the distance  
605 along the reaction coordinate is defined as the distance between the centre of mass of the  
606 ligand and receptor. Coloured bars beneath the x-axes indicate the orthosteric pocket (OP),  
607 extracellular vestibule (ECV), TM6/7 interface, lipid and aqueous phases. Data are plotted as  
608 an average (coloured line) and statistical error (grey), calculated from bootstrap analysis.  
609  $\Delta G_{\text{binding}}$  is expressed as mean  $\pm$  statistical error. **A.** PMF profile for morphine binding via the  
610 aqueous pathway. **B.** PMF profile for fentanyl binding via the aqueous pathway. **C.** PMF profile  
611 for morphine binding via the lipid pathway. **D.** PMF profile for fentanyl binding via the lipid  
612 pathway. Inset shows the same data with expanded y axis.  
613



614

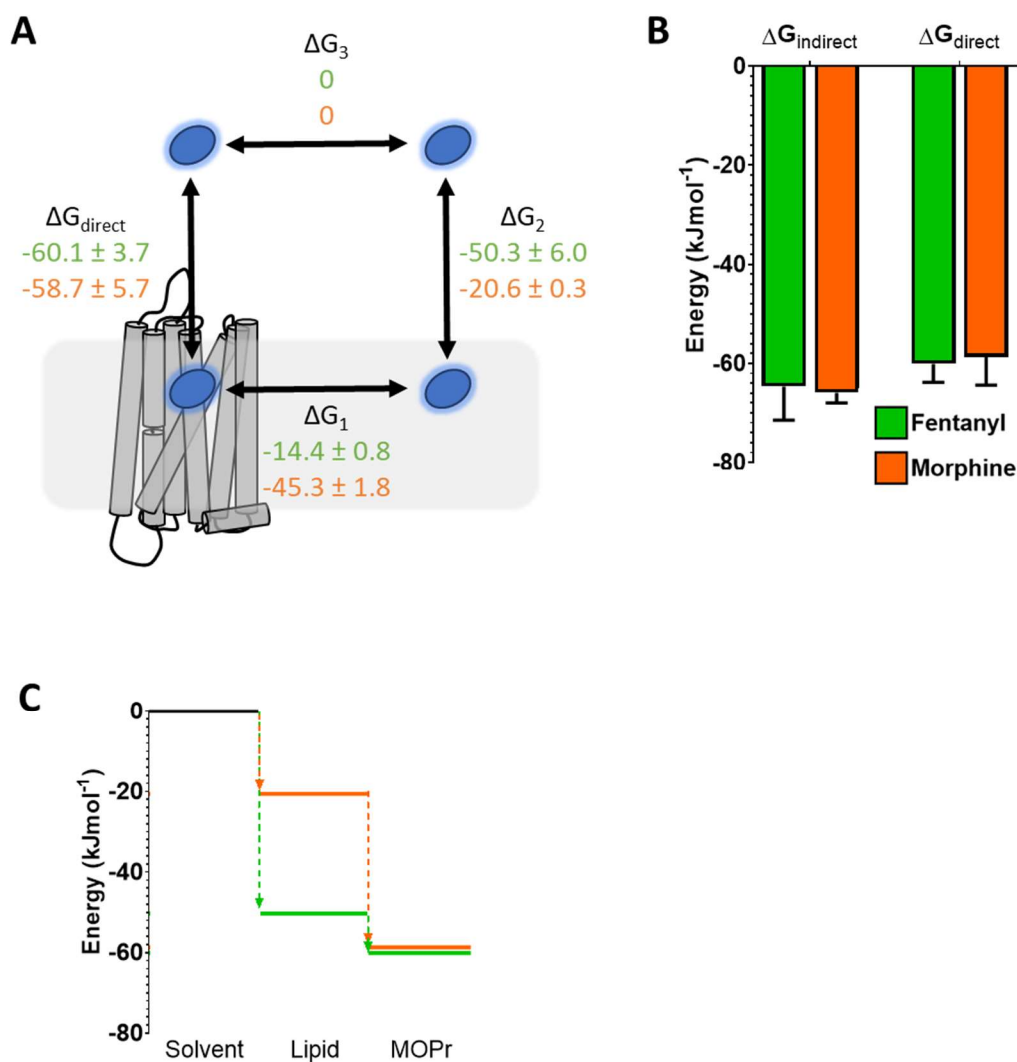

615

616 **Figure 5. Comparison of free energy landscapes for fentanyl and morphine binding to the**  
 617 **MOPr**

618 **A.** Thermodynamic cycle for opioid ligand binding to MOPr; either by the direct, aqueous  
 619 pathway ( $\Delta G_{\text{direct}}$ ) or via the lipid membrane ( $\Delta G_1 + \Delta G_2$ ). Values for protonated fentanyl  
 620 (green) and protonated morphine (orange) are taken from the PMF calculations in Fig 1D and  
 621 4. Diffusion through the solvent ( $\Delta G_3$ ) is assumed to be 0. **B.** Comparison of the free energy of  
 622 binding to MOPr directly via the aqueous solvent, or indirectly via the membrane, where  
 623  $\Delta G_{\text{indirect}} = \Delta G_1 + \Delta G_2 + \Delta G_3$ . **C.** 2D representation of the indirect, lipid binding route, using the  
 624 same values as Fig 5A. Fentanyl (green) has a greater propensity to move into the lipid from  
 625 the solvent, than morphine (orange).

626

627

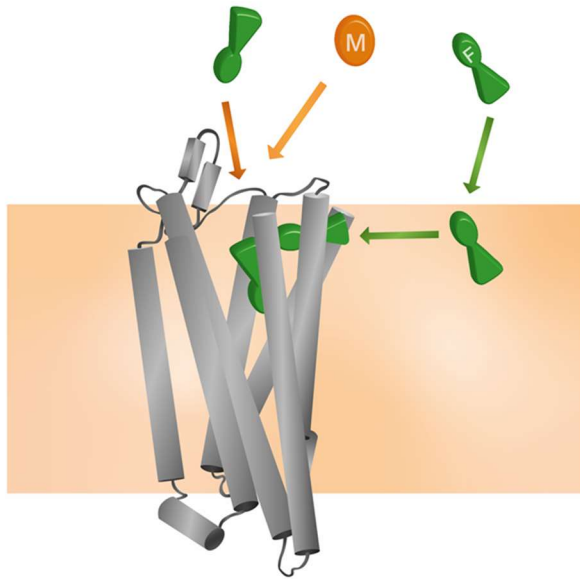

628

629 **Figure. 6. Model for the unique pharmacology of fentanyls at the MOPr**

630 In competition with a morphinan ligand (such as morphine or naloxone), fentanyl (green) can  
631 access the orthosteric pocket via two binding routes; the canonical aqueous pathway and by  
632 the novel lipid pathway. In contrast, the morphinan ligand (orange) only has access to one  
633 binding route.

634

635 **Supplementary Information**

| <b>Ligand (6 copies)</b> | <b>n</b> | <b>Simulation time (<math>\mu</math>s)</b> | <b>Ligand at the TM6/7 interface?</b> | <b>Orthosteric site binding?</b> |
|--------------------------|----------|--------------------------------------------|---------------------------------------|----------------------------------|
| Fentanyl (protonated)    | 6        | 5; 5; 5; 5; 5; 5                           | Yes; Yes; Yes; No; Yes; Yes           | No; No; Yes; No; No; No          |
| Fentanyl (neutral)       | 6        | 5; 5; 5; 5; 5; 5                           | Yes; Yes; No; Yes; No; Yes            | No; No; No; No; No; No           |
| Morphine (protonated)    | 3        | 1; 5; 1                                    | No; No; No                            | No; Yes; No                      |
| Morphine (neutral)       | 3        | 1; 1; 1                                    | No; No; No                            | No; No; No                       |

636

637 **Supplementary Table 1. Long-timescale, independent CG simulations for each opioid ligand**

638

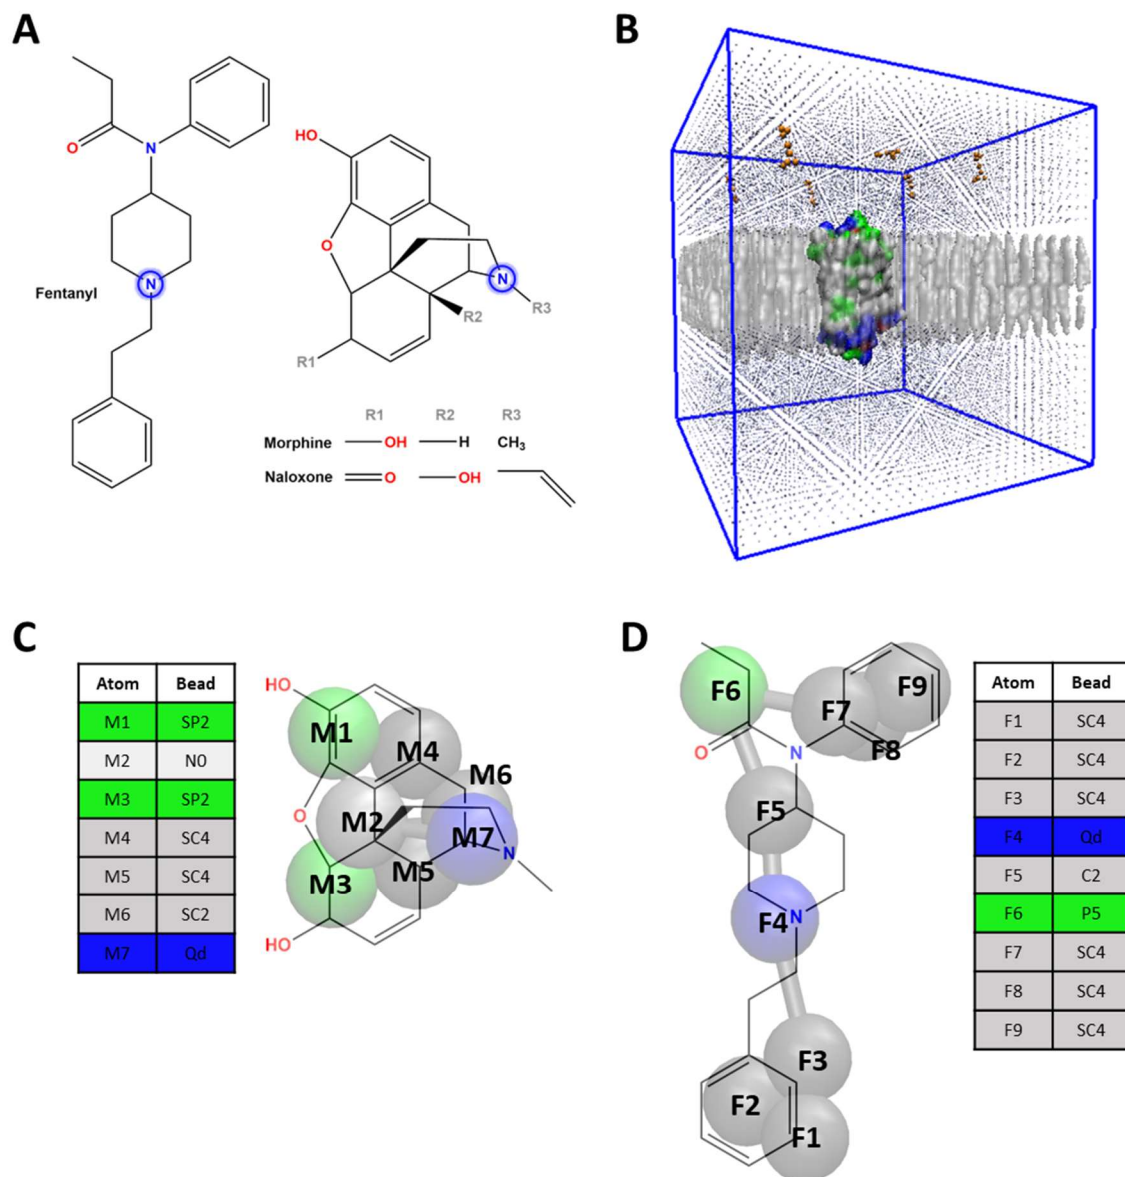

639  
640  
641  
642  
643  
644  
645  
646  
647  
648  
649  
650

### Supplementary Figure 1. Ligand parameterization and system set up

**A.** Elongated structure of fentanyl compared to the rigid ring structures of morphine and naloxone. The protonatable amine in both molecules is highlighted. **B.** The systems were set up with CG MOPr embedded in a POPE, POPC, cholesterol membrane (grey), solvated in water and ion beads (blue) and 6 molecules of either fentanyl or morphine (orange) randomly placed in the solvent. **C.** Morphine was parameterized for the Martini forcefield using 7 Martini beads. **D.** Fentanyl was parameterized for the Martini forcefield using 9 Martini beads. For simulations of neutral (unprotonated) ligands the Qd beads were replaced with Nd beads. For explanation of MARTINI bead types, see *Marrink et al 2007*.

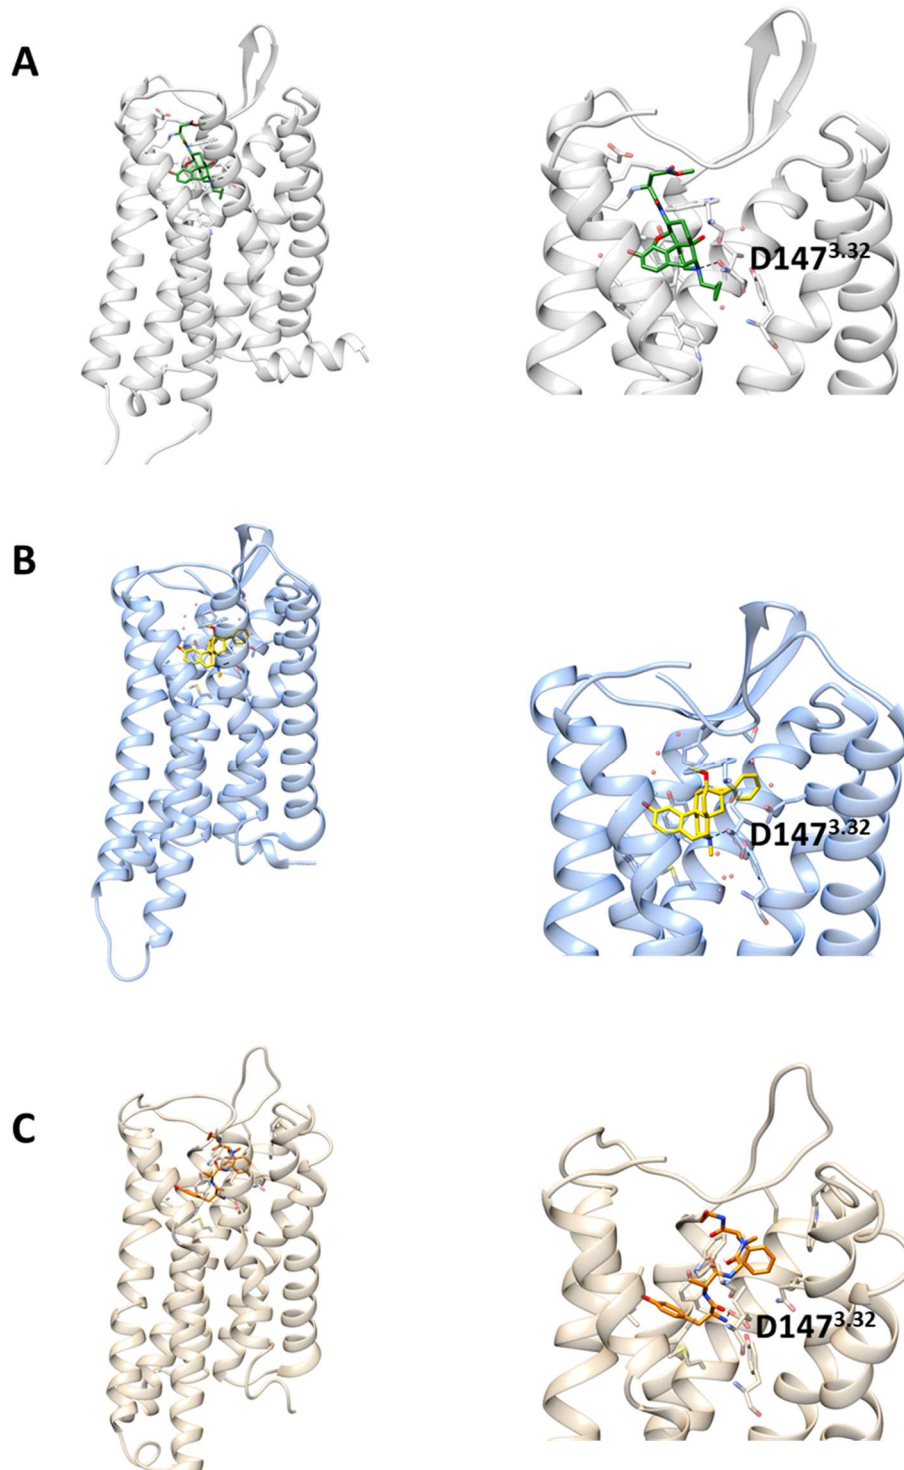

651

652

**Supplementary Figure 2. Structures of the MOPr**

653 **A.** X-ray crystal structure of MOPr (grey) bound to the antagonist  $\beta$ -FNA (green). PDB 4DKL (*Manglik*

654 *et al. 2012*). **B.** X-ray crystal structure of MOPr (blue) bound to the agonist BU72 (yellow). PDB 5C1M

655 (*Huang et al. 2015*). **C.** Cryo-EM structure of MOPr (tan) bound to the peptide agonist DAMGO

656 (orange). PDB 6DDF (*Koehl et al 2018*). In each case, residues forming the binding pocket are displayed

657 as sticks and the key amine-D147<sup>3.32</sup> interaction is indicated with a dashed line.

658

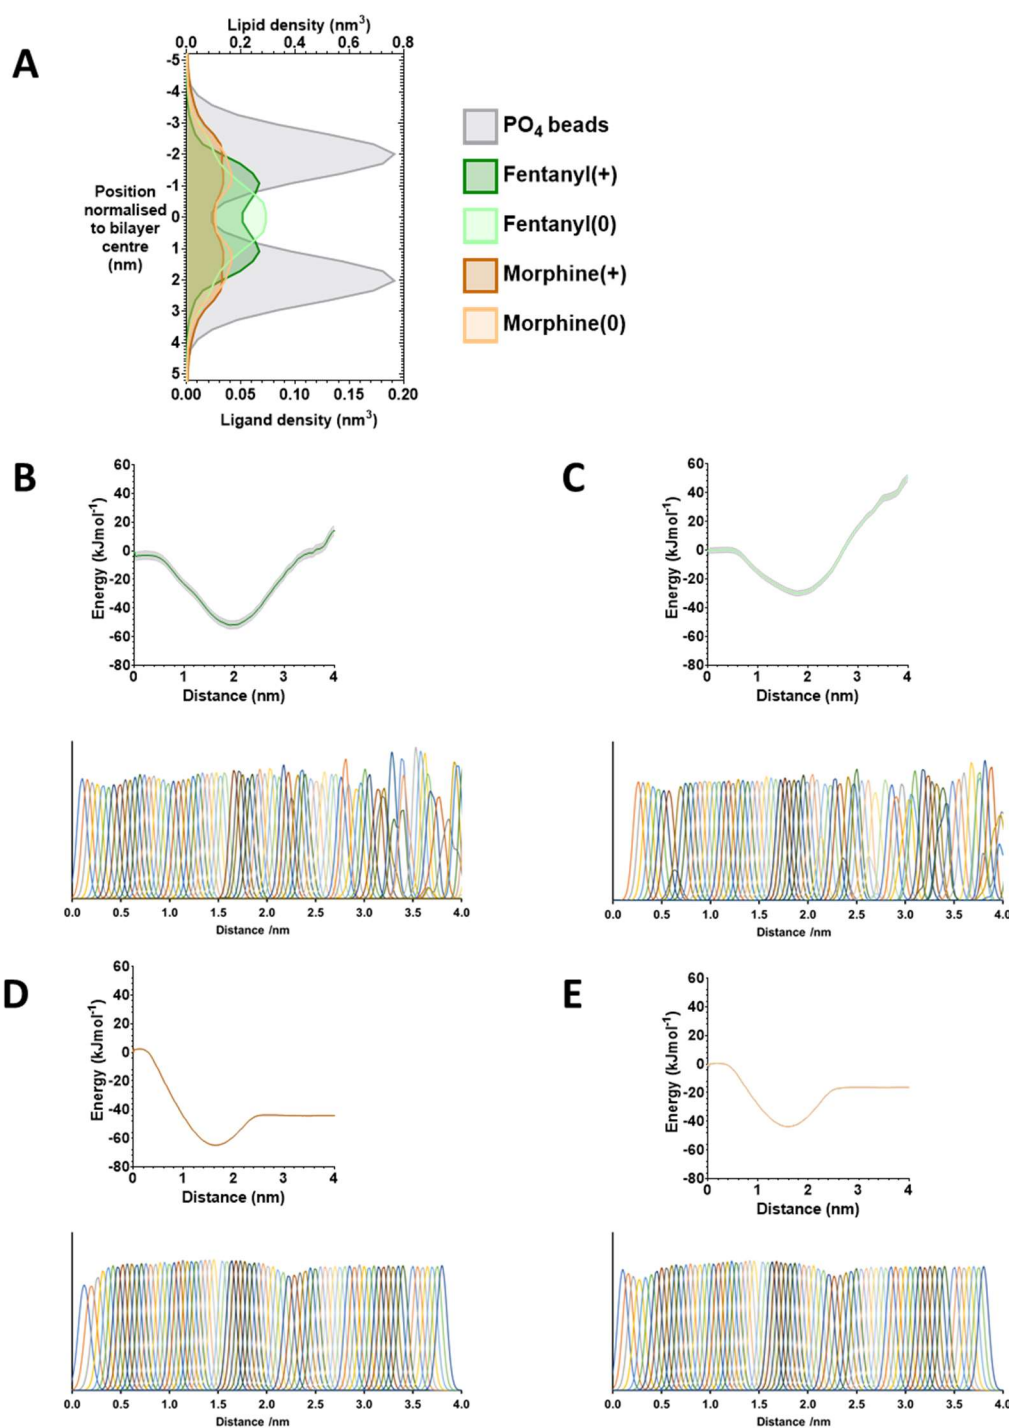

659  
660

### Supplementary Figure 3. Free energy calculations for ligand solvent/membrane partitioning

661 **A.** Density plots showing the average position of protonated fentanyl (dark green), neutral fentanyl  
662 (light green), protonated morphine (dark orange) and neutral morphine (light orange), in relation to  
663 the phosphate beads of the lipid membrane (grey). **B-D.** Full PMF profiles along the reaction  
664 coordinate for the umbrella sampling simulations of ligands partitioning between the centre of the  
665 lipid bilayer (0 nm) and the bulk aqueous solvent (4 nm): **B.** protonated fentanyl, **C.** neutral fentanyl,  
666 **D.** protonated morphine and **E.** neutral morphine. The histograms alongside each PMF profile indicate  
667 the umbrella sampling windows fully captured the entire reaction coordinate.  
668  
669

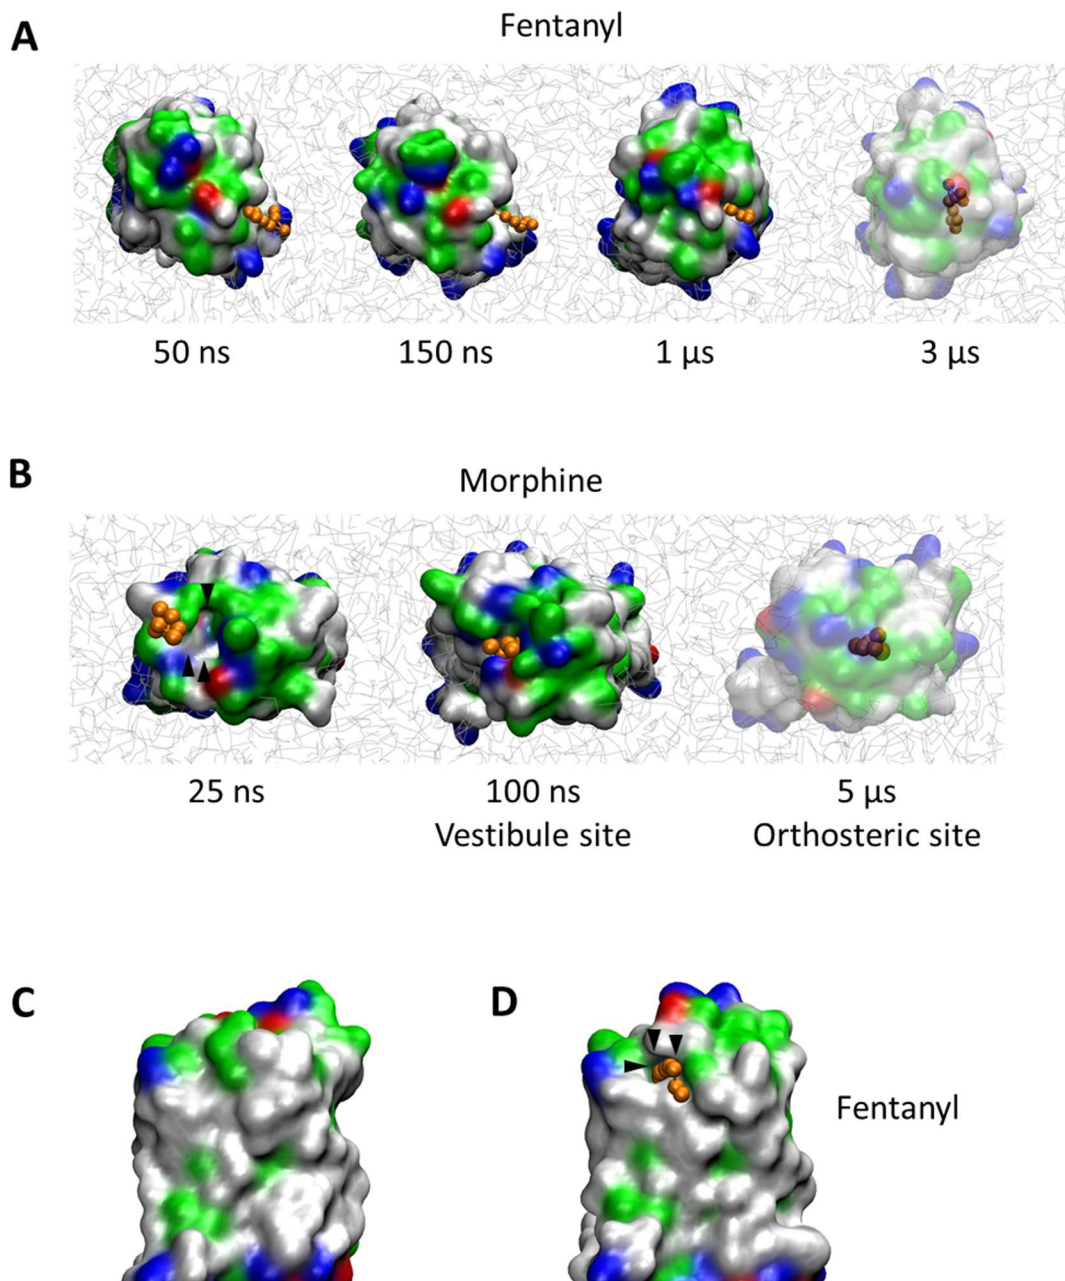

670  
671

672 **Supplementary Figure 4. Opioid ligand binding to the MOPr**

673 **A.** Fentanyl (orange) binding via the lipid membrane, with the MOPr viewed from the extracellular  
674 side of the membrane. **B.** Morphine (orange) binding via the extracellular vestibule (arrows), with  
675 MOPr viewed from the extracellular side of the membrane. **C.** Surface representation of the TM6/7  
676 interface in the absence of fentanyl. **D.** Fentanyl induces formation of a gap between TM6/7 (arrows)  
677 through which the ligand can bind. The protein is coloured according to residue properties  
678 (hydrophobic; grey, polar; green, acidic; red, basic; blue).  
679

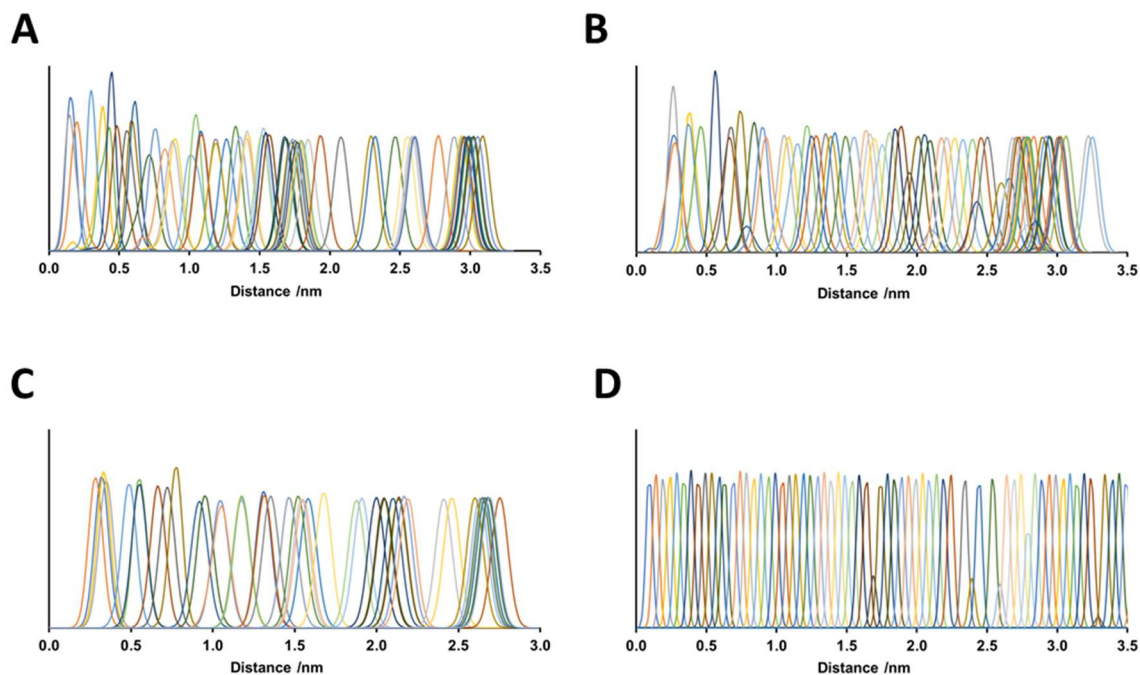

680  
681  
682  
683  
684  
685  
686  
687  
688  
689  
690

**Supplementary Figure 5. Free energy calculations for ligand binding pathways**

**A.** Histograms along the reaction coordinate for the umbrella sampling simulations of morphine binding via the aqueous pathway. **B.** Histograms along the reaction coordinate for the umbrella sampling simulations of fentanyl binding via the aqueous pathway. **C.** Histograms along the reaction coordinate for the umbrella sampling simulations of morphine binding via the lipid pathway. **D.** Histograms along the reaction coordinate for the umbrella sampling simulations of fentanyl binding via the lipid pathway.



691

692 **Supplementary Movie 1. Fentanyl binding via the lipid bilayer and transmembrane domains**

693

694

695 **Supplementary Movie 2. Morphine binding via the aqueous solvent and extracellular vestibule**

696
